# Supplementary material
Source: publisher figshare collection journal article supplement (https://gsajournals.figshare.com/ndownloader/files/27479693)
Supplement: Supplementary file 1 [file 27479693]

## Sheet: Sheet1
File S2. RNA-seq Metadata for all Strongyloides species
Metadata tables for the four Strongyloides species included in the Strongyloides RNA-seq Browser. For all species, metadata information was retrieved from the European Nucleotide Archive. For Strongyloides stercoralis, additional protocol information was retrieved from ArrayExpress.
Strongyloides stercoralis RNAseq Dataset Metadata
Data Source: Stoltzfus et al 2012 (DOI: 10.1371/journal.pntd.0001854)
sample	run_accession	group	DevelopmentalStage	Sex	CultureCondition	CultureTime	CultureTemp	BaermannTime	BaermannTemp	AgaroseMigrationTime	ExtractName	sample_accession	scientific_name	instrument_model	library_source	library_selection	experiment_alias
ERR146941	ERR146941	FLF	Young gravid females with 1-6 eggs per gonadal arm	Female	Incubated	48	21	1	29	1	FL_Female_20110928	SAMEA1469175	Strongyloides stercoralis	Illumina HiSeq 2000	TRANSCRIPTOMIC	RANDOM PCR	E-MTAB-1164:FL_Female_20110928
ERR146942	ERR146942	FLF	Young gravid females with 2-6 eggs per gonadal arm	Female	Incubated	48	20.6	1	29	1	FL_Female_20111012	SAMEA1469171	Strongyloides stercoralis	Illumina HiSeq 2000	TRANSCRIPTOMIC	RANDOM PCR	E-MTAB-1164:FL_Female_20111012
ERR146943	ERR146943	FLF	Young gravid females with 2-10 eggs per gonadal arm	Female	Incubated	48	20.5	1	28	1	FL_Female_20111013	SAMEA1469187	Strongyloides stercoralis	Illumina HiSeq 2000	TRANSCRIPTOMIC	RANDOM PCR	E-MTAB-1164:FL_Female_20111013
ERR146944	ERR146944	iL3a	Tissue migrating third stage larvae	Female	In vivo	72	na	na	na	na	L3_plus_g1	SAMEA1469183	Strongyloides stercoralis	Illumina HiSeq 2000	TRANSCRIPTOMIC	RANDOM PCR	E-MTAB-1164:L3_plus_g1
ERR146945	ERR146945	iL3a	Tissue migrating third stage larvae	Female	In vivo	72	na	na	na	na	L3_plus_g2	SAMEA1469188	Strongyloides stercoralis	Illumina HiSeq 2000	TRANSCRIPTOMIC	RANDOM PCR	E-MTAB-1164:L3_plus_g2
ERR146946	ERR146946	iL3a	Tissue migrating third stage larvae	Female	In vivo	72	na	na	na	na	L3_plus_g3	SAMEA1469179	Strongyloides stercoralis	Illumina HiSeq 2000	TRANSCRIPTOMIC	RANDOM PCR	E-MTAB-1164:L3_plus_g3
ERR146947	ERR146947	iL3	Young infectious third stage larvae	Female	Incubated	192	21	1	30	2	L3i_20110803	SAMEA1469189	Strongyloides stercoralis	Illumina HiSeq 2000	TRANSCRIPTOMIC	RANDOM PCR	E-MTAB-1164:L3i_20110803
ERR146948	ERR146948	iL3	Infectious third stage larvae	Female	Incubated	168	25	1	28	1	L3i_20110923	SAMEA1469172	Strongyloides stercoralis	Illumina HiSeq 2000	TRANSCRIPTOMIC	RANDOM PCR	E-MTAB-1164:L3i_20110923
ERR146949	ERR146949	iL3	Infectious third stage larvae	Female	Incubated	240	21	1	27	0.5	L3i_20111104	SAMEA1469181	Strongyloides stercoralis	Illumina HiSeq 2000	TRANSCRIPTOMIC	RANDOM PCR	E-MTAB-1164:L3i_20111104
ERR146950	ERR146950	pfL1	Post free living first stage larvae	Female	Incubated	72	21	2	29	2	PFL_L1_20110930	SAMEA1469186	Strongyloides stercoralis	Illumina HiSeq 2000	TRANSCRIPTOMIC	RANDOM PCR	E-MTAB-1164:PFL_L1_20110930
ERR146951	ERR146951	pfL1	Post free living first stage larvae	Female	Incubated	72	20.5	2	29	2	PFL_L1_20111010	SAMEA1469178	Strongyloides stercoralis	Illumina HiSeq 2000	TRANSCRIPTOMIC	RANDOM PCR	E-MTAB-1164:PFL_L1_20111010
ERR146952	ERR146952	pfL1	Post free living first stage larvae	Female	Incubated	72	20.5	2	29	2	PFL_L1_20111017	SAMEA1469184	Strongyloides stercoralis	Illumina HiSeq 2000	TRANSCRIPTOMIC	RANDOM PCR	E-MTAB-1164:PFL_L1_20111017
ERR146953	ERR146953	ppL1	Post parasitic first stage larvae	Mixed sex	Isolated from fresh canine feces	na	na	2	29	2	PP_L1_20110927	SAMEA1469177	Strongyloides stercoralis	Illumina HiSeq 2000	TRANSCRIPTOMIC	RANDOM PCR	E-MTAB-1164:PP_L1_20110927
ERR146954	ERR146954	ppL1	Post parasitic first stage larvae	Mixed sex	Isolated from fresh canine feces	na	na	2	28	2	PP_L1_20111013	SAMEA1469170	Strongyloides stercoralis	Illumina HiSeq 2000	TRANSCRIPTOMIC	RANDOM PCR	E-MTAB-1164:PP_L1_20111013
ERR146955	ERR146955	ppL1	Post parasitic first stage larvae	Mixed sex	Isolated from fresh canine feces	na	na	2	28	2	PP_L1_20111017	SAMEA1469174	Strongyloides stercoralis	Illumina HiSeq 2000	TRANSCRIPTOMIC	RANDOM PCR	E-MTAB-1164:PP_L1_20111017
ERR146956	ERR146956	ppL3	Post parasitic heterogonically developing ~third stage larvae	Female enriched	Incubated	24	21	1	29	2	PP_L3_20110929	SAMEA1469182	Strongyloides stercoralis	Illumina HiSeq 2000	TRANSCRIPTOMIC	RANDOM PCR	E-MTAB-1164:PP_L3_20110929
ERR146957	ERR146957	ppL3	Post parasitic heterogonically developing ~third stage larvae	Female enriched	Incubated	24	21	1	29.5	1	PP_L3_20111003	SAMEA1469180	Strongyloides stercoralis	Illumina HiSeq 2000	TRANSCRIPTOMIC	RANDOM PCR	E-MTAB-1164:PP_L3_20111003
ERR146958	ERR146958	ppL3	Post parasitic heterogonically developing ~third stage larvae	Female enriched	Incubated	24	20.6	1	28	1	PP_L3_20111012	SAMEA1469185	Strongyloides stercoralis	Illumina HiSeq 2000	TRANSCRIPTOMIC	RANDOM PCR	E-MTAB-1164:PP_L3_20111012
ERR146959	ERR146959	PF	Gravid parasitic females	Female	In vivo	21	na	na	na	na	P_Female_g1	SAMEA1469173	Strongyloides stercoralis	Illumina HiSeq 2000	TRANSCRIPTOMIC	RANDOM PCR	E-MTAB-1164:P_Female_g1
ERR146960	ERR146960	PF	Gravid parasitic females	Female	In vivo	21	na	na	na	na	P_Female_g2	SAMEA1469190	Strongyloides stercoralis	Illumina HiSeq 2000	TRANSCRIPTOMIC	RANDOM PCR	E-MTAB-1164:P_Female_g2
ERR146961	ERR146961	PF	Gravid parasitic females	Female	In vivo	21	na	na	na	na	P_Female_g3	SAMEA1469176	Strongyloides stercoralis	Illumina HiSeq 2000	TRANSCRIPTOMIC	RANDOM PCR	E-MTAB-1164:P_Female_g3
Strongyloides ratti RNAseq Dataset Metadata
Source: Hunt et al 2016 (DOI: 10.1038/ng.3495)
source	sample	group	DevelopmentalStage	Sex	block	Strain	Protocol REF	Performer	Assay Name	Technology Type	Comment[NOMINAL_LENGTH]	Comment[LIBRARY_SELECTION]	Comment[NOMINAL_SDEV]	Comment[LIBRARY_SOURCE]	Comment[LIBRARY_STRATEGY]	Comment[LIBRARY_LAYOUT]	Scan Name	BioProject	BioSample	INSDC_center_name	Instrument
ERS091917	ERR225783	FLM	free living adult	male	PRJEB3187	ED321 heterogonic	P-MTAB-30750	SC	ERX200443	high_throughput_sequencing	343	cDNA	655	TRANSCRIPTOMIC	RNA-Seq	PAIRED	ERR225783_1	PRJEB3187	SAMEA1692349	Wellcome Sanger Institute	Illumina Genome Analyzer II
ERS092590	ERR225784	iL3	iL3	female	PRJEB3187	ED321	P-MTAB-30750	SC	ERX200444	high_throughput_sequencing	350	cDNA	0	TRANSCRIPTOMIC	RNA-Seq	PAIRED	ERR225784_1	PRJEB3187	SAMEA1692348	Wellcome Sanger Institute	Illumina MiSeq
ERS209991	ERR299168	PF	parasitic adult	female	PRJEB1376	ED321Het	P-MTAB-33290	SC	ERX272493	sequencing assay	350	cDNA	0	TRANSCRIPTOMIC	RNA-Seq	PAIRED	ERR299168_1	PRJEB1376	SAMEA1920099	Wellcome Sanger Institute	ILLUMINA
ERS209992	ERR299169	PF	parasitic adult	female	PRJEB1376	ED321Het	P-MTAB-33290	SC	ERX272494	sequencing assay	350	cDNA	0	TRANSCRIPTOMIC	RNA-Seq	PAIRED	ERR299169_1	PRJEB1376	SAMEA1920101	Wellcome Sanger Institute	ILLUMINA
ERS209993	ERR299170	PF	parasitic adult	female	PRJEB1376	ED321Het	P-MTAB-33290	SC	ERX272495	sequencing assay	350	cDNA	0	TRANSCRIPTOMIC	RNA-Seq	PAIRED	ERR299170_1	PRJEB1376	SAMEA1920100	Wellcome Sanger Institute	ILLUMINA
ERS209994	ERR299171	FLF	free living adult	female	PRJEB1376	ED321Het	P-MTAB-33290	SC	ERX272496	sequencing assay	350	cDNA	0	TRANSCRIPTOMIC	RNA-Seq	PAIRED	ERR299171_1	PRJEB1376	SAMEA1920102	Wellcome Sanger Institute	ILLUMINA
ERS209995	ERR299172	FLF	free living adult	female	PRJEB1376	ED321Het	P-MTAB-33290	SC	ERX272497	sequencing assay	350	cDNA	0	TRANSCRIPTOMIC	RNA-Seq	PAIRED	ERR299172_1	PRJEB1376	SAMEA1920103	Wellcome Sanger Institute	ILLUMINA
ERS209996	ERR299173	FLF	free living adult	female	PRJEB1376	ED321Het	P-MTAB-33290	SC	ERX272498	sequencing assay	350	cDNA	0	TRANSCRIPTOMIC	RNA-Seq	PAIRED	ERR299173_1	PRJEB1376	SAMEA1920104	Wellcome Sanger Institute	ILLUMINA
ERS209991	ERR299174	PF	parasitic adult	female	PRJEB1376	ED321Het	P-MTAB-33290	SC	ERX272499	sequencing assay	350	cDNA	0	TRANSCRIPTOMIC	RNA-Seq	PAIRED	ERR299174_1	PRJEB1376	SAMEA1920099	Wellcome Sanger Institute	ILLUMINA
ERS209992	ERR299175	PF	parasitic adult	female	PRJEB1376	ED321Het	P-MTAB-33290	SC	ERX272500	sequencing assay	350	cDNA	0	TRANSCRIPTOMIC	RNA-Seq	PAIRED	ERR299175_1	PRJEB1376	SAMEA1920101	Wellcome Sanger Institute	ILLUMINA
ERS209993	ERR299176	PF	parasitic adult	female	PRJEB1376	ED321Het	P-MTAB-33290	SC	ERX272501	sequencing assay	350	cDNA	0	TRANSCRIPTOMIC	RNA-Seq	PAIRED	ERR299176_1	PRJEB1376	SAMEA1920100	Wellcome Sanger Institute	ILLUMINA
ERS209994	ERR299177	FLF	free living adult	female	PRJEB1376	ED321Het	P-MTAB-33290	SC	ERX272502	sequencing assay	350	cDNA	0	TRANSCRIPTOMIC	RNA-Seq	PAIRED	ERR299177_1	PRJEB1376	SAMEA1920102	Wellcome Sanger Institute	ILLUMINA
ERS209995	ERR299178	FLF	free living adult	female	PRJEB1376	ED321Het	P-MTAB-33290	SC	ERX272503	sequencing assay	350	cDNA	0	TRANSCRIPTOMIC	RNA-Seq	PAIRED	ERR299178_1	PRJEB1376	SAMEA1920103	Wellcome Sanger Institute	ILLUMINA
ERS209996	ERR299179	FLF	free living adult	female	PRJEB1376	ED321Het	P-MTAB-33290	SC	ERX272504	sequencing assay	350	cDNA	0	TRANSCRIPTOMIC	RNA-Seq	PAIRED	ERR299179_1	PRJEB1376	SAMEA1920104	Wellcome Sanger Institute	ILLUMINA
Strongyloides papillosus RNAseq Dataset Metadata
Source: Hunt et al 2016 (DOI: 10.1038/ng.3495)
sample	BioSample	group	DevelopmentStage	BioProject	Center Name	Consent	DATASTORE filetype	DATASTORE provider	DATASTORE region	ENA_CHECKLIST	ENA-FIRST-PUBLIC (run)	ENA-LAST-UPDATE (run)	Experiment	INSDC_center_name	INSDC_first_public	INSDC_last_update	INSDC_status	Instrument	Library Name	LibraryLayout	LibrarySelection	LibrarySource	Organism	Platform	ReleaseDate	SRA_accession	SRA Study
ERR1466827	SAMEA4043122	flL1L2	Free living L1L2 rep1	PRJEB14543	MAX PLANCK INSTITUTE FOR DEVELOPMENTAL BIOLOGY	public	fastq,sra	ena,gs,ncbi,s3	ena,gs.US,ncbi.public,s3.us-east-1	ERC000011	42813	43420	ERX1537304	MAX PLANCK INSTITUTE FOR DEVELOPMENTAL BIOLOGY	2017-03-19T17:01:38Z	2016-06-21T14:47:45Z	public	Illumina HiSeq 2000	Free living L1L2 rep1	PAIRED	RANDOM	TRANSCRIPTOMIC	Strongyloides papillosus	ILLUMINA	2017-03-20T00:00:00Z	ERS1214232	ERP016188
ERR1466828	SAMEA4043123	flL1L2	Free living L1L2 rep2	PRJEB14543	MAX PLANCK INSTITUTE FOR DEVELOPMENTAL BIOLOGY	public	fastq,sra	ena,gs,ncbi,s3	ena,gs.US,ncbi.public,s3.us-east-1	ERC000011	42813	43420	ERX1537305	MAX PLANCK INSTITUTE FOR DEVELOPMENTAL BIOLOGY	2017-03-19T17:01:38Z	2016-06-21T14:47:45Z	public	Illumina HiSeq 2000	Free living L1L2 rep2	PAIRED	RANDOM	TRANSCRIPTOMIC	Strongyloides papillosus	ILLUMINA	2017-03-20T00:00:00Z	ERS1214233	ERP016188
ERR1466829	SAMEA4043124	FLF	Free living females rep1	PRJEB14543	MAX PLANCK INSTITUTE FOR DEVELOPMENTAL BIOLOGY	public	fastq,sra	ena,gs,ncbi,s3	ena,gs.US,ncbi.public,s3.us-east-1	ERC000011	42813	43420	ERX1537306	MAX PLANCK INSTITUTE FOR DEVELOPMENTAL BIOLOGY	2017-03-19T17:01:38Z	2016-06-21T14:47:45Z	public	Illumina HiSeq 2000	Free living females rep1	PAIRED	RANDOM	TRANSCRIPTOMIC	Strongyloides papillosus	ILLUMINA	2017-03-20T00:00:00Z	ERS1214234	ERP016188
ERR1466830	SAMEA4043125	FLF	Free living females rep2	PRJEB14543	MAX PLANCK INSTITUTE FOR DEVELOPMENTAL BIOLOGY	public	fastq,sra	ena,gs,ncbi,s3	ena,gs.US,ncbi.public,s3.us-east-1	ERC000011	42813	43420	ERX1537307	MAX PLANCK INSTITUTE FOR DEVELOPMENTAL BIOLOGY	2017-03-19T17:01:38Z	2016-06-21T14:47:45Z	public	Illumina HiSeq 2000	Free living females rep2	PAIRED	RANDOM	TRANSCRIPTOMIC	Strongyloides papillosus	ILLUMINA	2017-03-20T00:00:00Z	ERS1214235	ERP016188
ERR1466831	SAMEA4043126	FLM	Free living males rep1	PRJEB14543	MAX PLANCK INSTITUTE FOR DEVELOPMENTAL BIOLOGY	public	fastq,sra	ena,gs,ncbi,s3	ena,gs.US,ncbi.public,s3.us-east-1	ERC000011	42813	43420	ERX1537308	MAX PLANCK INSTITUTE FOR DEVELOPMENTAL BIOLOGY	2017-03-19T17:01:38Z	2016-06-21T14:47:45Z	public	Illumina HiSeq 2000	Free living males rep1	PAIRED	RANDOM	TRANSCRIPTOMIC	Strongyloides papillosus	ILLUMINA	2017-03-20T00:00:00Z	ERS1214236	ERP016188
ERR1466832	SAMEA4043127	FLM	Free living males rep2	PRJEB14543	MAX PLANCK INSTITUTE FOR DEVELOPMENTAL BIOLOGY	public	fastq,sra	ena,gs,ncbi,s3	ena,gs.US,ncbi.public,s3.us-east-1	ERC000011	42813	43420	ERX1537309	MAX PLANCK INSTITUTE FOR DEVELOPMENTAL BIOLOGY	2017-03-19T17:01:38Z	2016-06-21T14:47:45Z	public	Illumina HiSeq 2000	Free living males rep2	PAIRED	RANDOM	TRANSCRIPTOMIC	Strongyloides papillosus	ILLUMINA	2017-03-20T00:00:00Z	ERS1214237	ERP016188
ERR1466833	SAMEA4043128	iL3	Infective L3 rep1	PRJEB14543	MAX PLANCK INSTITUTE FOR DEVELOPMENTAL BIOLOGY	public	fastq,sra	ena,gs,ncbi,s3	ena,gs.US,ncbi.public,s3.us-east-1	ERC000011	42813	43420	ERX1537310	MAX PLANCK INSTITUTE FOR DEVELOPMENTAL BIOLOGY	2017-03-19T17:01:38Z	2016-06-21T14:47:45Z	public	Illumina HiSeq 2000	Infective L3 rep1	PAIRED	RANDOM	TRANSCRIPTOMIC	Strongyloides papillosus	ILLUMINA	2017-03-20T00:00:00Z	ERS1214238	ERP016188
ERR1466834	SAMEA4043129	iL3	Infective L3 rep2	PRJEB14543	MAX PLANCK INSTITUTE FOR DEVELOPMENTAL BIOLOGY	public	fastq,sra	ena,gs,ncbi,s3	ena,gs.US,ncbi.public,s3.us-east-1	ERC000011	42813	43420	ERX1537311	MAX PLANCK INSTITUTE FOR DEVELOPMENTAL BIOLOGY	2017-03-19T17:01:38Z	2016-06-21T14:47:45Z	public	Illumina HiSeq 2000	Infective L3 rep2	PAIRED	RANDOM	TRANSCRIPTOMIC	Strongyloides papillosus	ILLUMINA	2017-03-20T00:00:00Z	ERS1214239	ERP016188
ERR1466835	SAMEA4043130	PF	Parasitic females rep1	PRJEB14543	MAX PLANCK INSTITUTE FOR DEVELOPMENTAL BIOLOGY	public	fastq,sra	ena,gs,ncbi,s3	ena,gs.US,ncbi.public,s3.us-east-1	ERC000011	42813	43420	ERX1537312	MAX PLANCK INSTITUTE FOR DEVELOPMENTAL BIOLOGY	2017-03-19T17:01:38Z	2016-06-21T14:47:45Z	public	Illumina HiSeq 2000	Parasitic females rep1	PAIRED	RANDOM	TRANSCRIPTOMIC	Strongyloides papillosus	ILLUMINA	2017-03-20T00:00:00Z	ERS1214240	ERP016188
ERR1466836	SAMEA4043131	pL1L2	Parasitic L1L2 rep1	PRJEB14543	MAX PLANCK INSTITUTE FOR DEVELOPMENTAL BIOLOGY	public	fastq,sra	ena,gs,ncbi,s3	ena,gs.US,ncbi.public,s3.us-east-1	ERC000011	42813	43420	ERX1537313	MAX PLANCK INSTITUTE FOR DEVELOPMENTAL BIOLOGY	2017-03-19T17:01:38Z	2016-06-21T14:47:45Z	public	Illumina HiSeq 2000	Parasitic L1L2 rep1	PAIRED	RANDOM	TRANSCRIPTOMIC	Strongyloides papillosus	ILLUMINA	2017-03-20T00:00:00Z	ERS1214241	ERP016188
Strongyloides venezuelensis RNAseq Dataset Metadata
Source: Hunt et al 2018 (DOI: 10.1038/s41598-018-23514-z)
source	sample	group	DevelopmentalStage	sex	batch	strain	BioProject	BioSample	replicate	Center Name	Consent	DATASTORE filetype	DATASTORE provider	DATASTORE region	dev_stage	Experiment	Instrument	Library Name	LibraryLayout	LibrarySelection	LibrarySource	Organism	Platform	ReleaseDate	Sample Name	sample_name	SRA Study	host
SAMD00096905	DRR106346	FLF	free-living	female	FLF_PF	HH1	PRJDB3457	SAMD00096905	biological replicate 1	MIYAZAKI	public	sra	gs,ncbi,s3	gs.US,ncbi.public,s3.us-east-1	free-living adult	DRX099447	Illumina MiSeq	SvFFWTA1	PAIRED	cDNA	TRANSCRIPTOMIC	Strongyloides venezuelensis	ILLUMINA	2019-09-26T00:00:00Z	SAMD00096905	N703_SvFFWTA1	DRP002629	Rattus norvegicus
SAMD00096905	DRR106347	FLF	free-living	female	FLF_PF	HH1	PRJDB3457	SAMD00096905	biological replicate 1	MIYAZAKI	public	sra	gs,ncbi,s3	gs.US,ncbi.public,s3.us-east-1	free-living adult	DRX099447	Illumina MiSeq	SvFFWTA1	PAIRED	cDNA	TRANSCRIPTOMIC	Strongyloides venezuelensis	ILLUMINA	2019-09-26T00:00:00Z	SAMD00096905	N703_SvFFWTA1	DRP002629	Rattus norvegicus
SAMD00096906	DRR106348	FLF	free-living	female	FLF_PF	HH1	PRJDB3457	SAMD00096906	biological replicate 2	MIYAZAKI	public	sra	gs,ncbi,s3	gs.US,ncbi.public,s3.us-east-1	free-living adult	DRX099448	Illumina MiSeq	SvFFWTA2	PAIRED	cDNA	TRANSCRIPTOMIC	Strongyloides venezuelensis	ILLUMINA	2019-09-26T00:00:00Z	SAMD00096906	N704_SvFFWTA2	DRP002629	Rattus norvegicus
SAMD00096906	DRR106349	FLF	free-living	female	FLF_PF	HH1	PRJDB3457	SAMD00096906	biological replicate 2	MIYAZAKI	public	sra	gs,ncbi,s3	gs.US,ncbi.public,s3.us-east-1	free-living adult	DRX099448	Illumina MiSeq	SvFFWTA2	PAIRED	cDNA	TRANSCRIPTOMIC	Strongyloides venezuelensis	ILLUMINA	2019-09-26T00:00:00Z	SAMD00096906	N704_SvFFWTA2	DRP002629	Rattus norvegicus
SAMD00096907	DRR106350	FLF	free-living	female	FLF_PF	HH1	PRJDB3457	SAMD00096907	biological replicate 3	MIYAZAKI	public	sra	gs,ncbi,s3	gs.US,ncbi.public,s3.us-east-1	free-living adult	DRX099449	Illumina MiSeq	SvFFWTA3	PAIRED	cDNA	TRANSCRIPTOMIC	Strongyloides venezuelensis	ILLUMINA	2019-09-26T00:00:00Z	SAMD00096907	N705_SvFFWTA3	DRP002629	Rattus norvegicus
SAMD00096907	DRR106351	FLF	free-living	female	FLF_PF	HH1	PRJDB3457	SAMD00096907	biological replicate 3	MIYAZAKI	public	sra	gs,ncbi,s3	gs.US,ncbi.public,s3.us-east-1	free-living adult	DRX099449	Illumina MiSeq	SvFFWTA3	PAIRED	cDNA	TRANSCRIPTOMIC	Strongyloides venezuelensis	ILLUMINA	2019-09-26T00:00:00Z	SAMD00096907	N705_SvFFWTA3	DRP002629	Rattus norvegicus
SAMD00096908	DRR106352	PF	parasite	female	FLF_PF	HH1	PRJDB3457	SAMD00096908	biological replicate 1	MIYAZAKI	public	sra	gs,ncbi,s3	gs.US,ncbi.public,s3.us-east-1	parasitic adult	DRX099450	Illumina MiSeq	SvPFWTA1	PAIRED	cDNA	TRANSCRIPTOMIC	Strongyloides venezuelensis	ILLUMINA	2019-09-26T00:00:00Z	SAMD00096908	N706_SvPFWTA1	DRP002629	Rattus norvegicus
SAMD00096908	DRR106353	PF	parasite	female	FLF_PF	HH1	PRJDB3457	SAMD00096908	biological replicate 1	MIYAZAKI	public	sra	gs,ncbi,s3	gs.US,ncbi.public,s3.us-east-1	parasitic adult	DRX099450	Illumina MiSeq	SvPFWTA1	PAIRED	cDNA	TRANSCRIPTOMIC	Strongyloides venezuelensis	ILLUMINA	2019-09-26T00:00:00Z	SAMD00096908	N706_SvPFWTA1	DRP002629	Rattus norvegicus
SAMD00096909	DRR106354	PF	parasite	female	FLF_PF	HH1	PRJDB3457	SAMD00096909	biological replicate 2	MIYAZAKI	public	sra	gs,ncbi,s3	gs.US,ncbi.public,s3.us-east-1	parasitic adult	DRX099451	Illumina MiSeq	SvPFWTA2	PAIRED	cDNA	TRANSCRIPTOMIC	Strongyloides venezuelensis	ILLUMINA	2019-09-26T00:00:00Z	SAMD00096909	N707_SvPFWTA2	DRP002629	Rattus norvegicus
SAMD00096909	DRR106355	PF	parasite	female	FLF_PF	HH1	PRJDB3457	SAMD00096909	biological replicate 2	MIYAZAKI	public	sra	gs,ncbi,s3	gs.US,ncbi.public,s3.us-east-1	parasitic adult	DRX099451	Illumina MiSeq	SvPFWTA2	PAIRED	cDNA	TRANSCRIPTOMIC	Strongyloides venezuelensis	ILLUMINA	2019-09-26T00:00:00Z	SAMD00096909	N707_SvPFWTA2	DRP002629	Rattus norvegicus
SAMD00096910	DRR106356	PF	parasite	female	FLF_PF	HH1	PRJDB3457	SAMD00096910	biological replicate 3	MIYAZAKI	public	sra	gs,ncbi,s3	gs.US,ncbi.public,s3.us-east-1	parasitic adult	DRX099452	Illumina MiSeq	SvPFWTA3	PAIRED	cDNA	TRANSCRIPTOMIC	Strongyloides venezuelensis	ILLUMINA	2019-09-26T00:00:00Z	SAMD00096910	N708_SvPFWTA3	DRP002629	Rattus norvegicus
SAMD00096910	DRR106357	PF	parasite	female	FLF_PF	HH1	PRJDB3457	SAMD00096910	biological replicate 3	MIYAZAKI	public	sra	gs,ncbi,s3	gs.US,ncbi.public,s3.us-east-1	parasitic adult	DRX099452	Illumina MiSeq	SvPFWTA3	PAIRED	cDNA	TRANSCRIPTOMIC	Strongyloides venezuelensis	ILLUMINA	2019-09-26T00:00:00Z	SAMD00096910	N708_SvPFWTA3	DRP002629	Rattus norvegicus
